# Supplementary material for: Abnormalities at three musculoskeletal sites on whole-body positron emission tomography/computed tomography can diagnose polymyalgia rheumatica with high sensitivity and specificity
Source: Springer Nature journal article supplement (doi:10.1007/s00259-020-04731-z), 2020-02-23
Supplement: MOESM1 [file 17735634]

**Abnormalities at Three Musculoskeletal Sites on Whole-Body Positron Emission Tomography/Computed Tomography Can Diagnose Polymyalgia Rheumatica with High Sensitivity and Specificity**

Claire E Owen[[1]](#footnote-1),[[2]](#footnote-2)

Aurora MT Poon2,[[3]](#footnote-3)

Victor Yang1

Christopher McMaster1

Sze Ting Lee2,3,[[4]](#footnote-4)

David FL Liew1,2

Jessica L Leung1,2

Andrew M Scott2,3,4

Russell RC Buchanan1,2

**Correspondence and requests for reprints to:**

Dr Claire Owen

Rheumatology Department

Austin Health – Repatriation Campus

Level 1, North Wing

300 Waterdale Road,

Heidelberg West VIC

Australia 3081.

Email: [claire.owen@austin.org.au](mailto:claire.owen@austin.org.au)

**Supplementary Information**

Online Resource 1: Atlas of PET/CT Musculoskeletal Sites

PET/CT scoring in this study comprised qualitative and semi-quantitative (SUVmax) assessment of abnormal 18F-FDG uptake at 21 musculoskeletal sites in all cases and controls. A pictorial example of each is presented below, with yellow arrows indicating the anatomic area of interest.

*Shoulder Girdle*


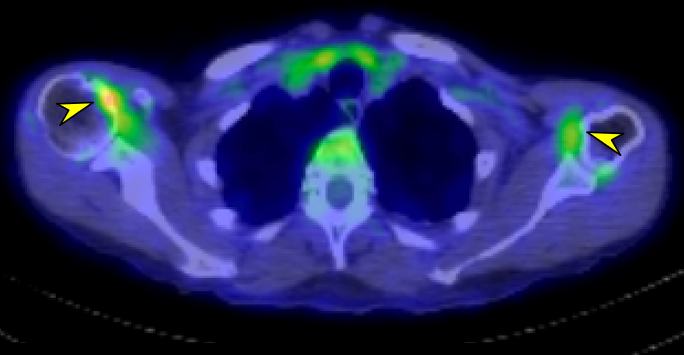
**Figure 2:** Two peri-articular shoulder regions.


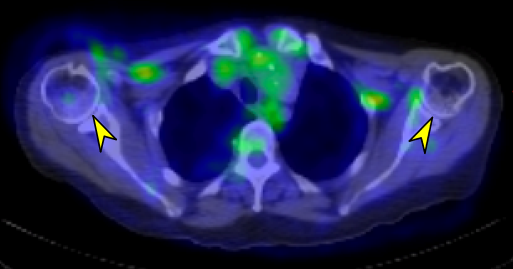
**Figure 3:** Two glenohumeral joints.

**Figure 4:** Two acromioclavicular joints.


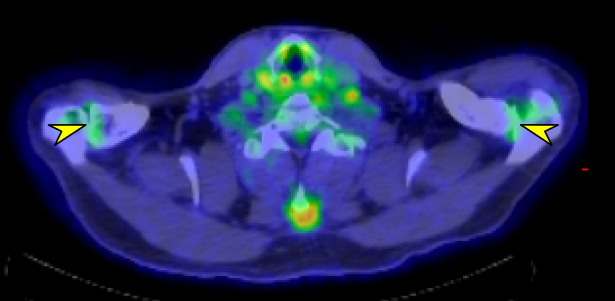


**Figure 5:** Two sternoclavicular joints.


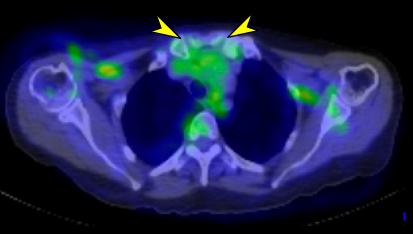


*Hip Girdle*

**Figure 6:** Two peri-articular hip regions.


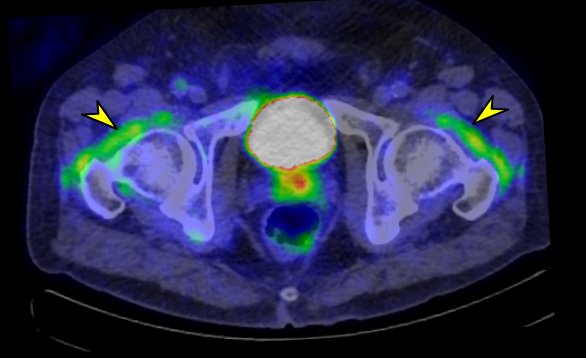


**Figure 7:** Two hip joints.


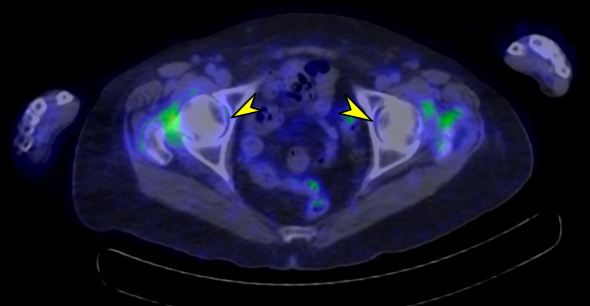


**Figure 8:** Two trochanteric regions.


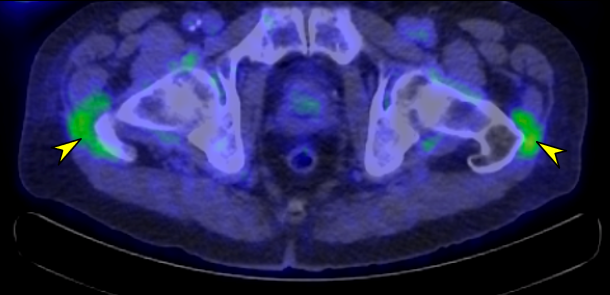


**Figure 9:** Regions adjacent to the two ischial tuberosities.


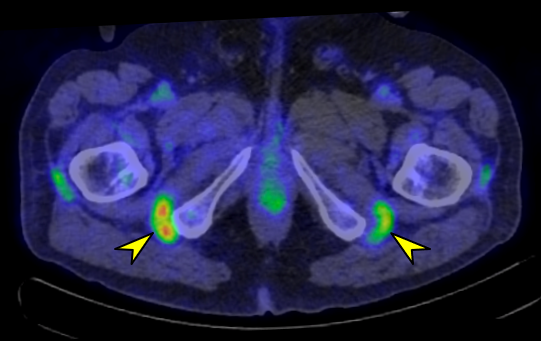


*Knee*

**Figure 10:** Two knee joints.


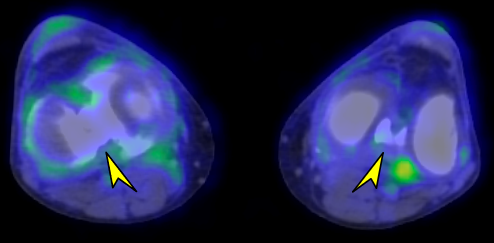


**Figure 11:** Two posteromedial knee regions.


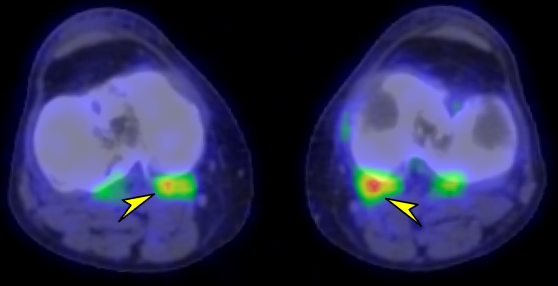


*Interspinous Bursa*


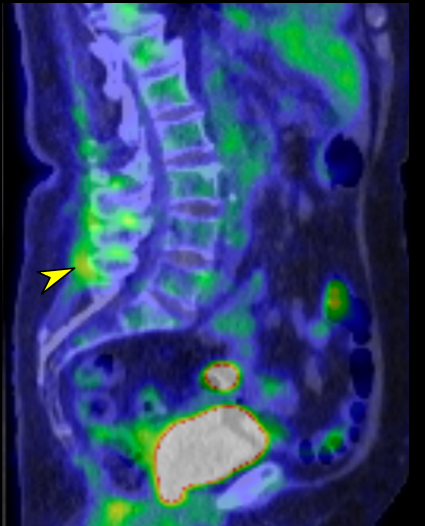
**Figure 12:** Most PET avid interspinous bursa.

Online Resource 2: Detailed Statistical Methods

### *Exploration of Models*

Potential combinations of musculoskeletal sites were first investigated using a combinatorial approach. 2,047 logistic regression models were trained, using every possible combination of musculoskeletal site scores. Models were assessed for predictive accuracy using the ROC-AUC. To reduce over-fitting, out-of-sample error was assessed by leave-one-out cross-validation using the *boot* package.(1, 2) Superior models are those with high AUC (>0.95) and low cross-validation error (<0.06). Figure S12 shows that high quality (high AUC, low cross-validation error) models only emerge when three or more variables are included in the model. As expected, models with many variables (ten or eleven) have greater cross-validation error.

**Figure 13:** Models with AUC >0.95 and cross-validation error <0.06 are shaded blue.


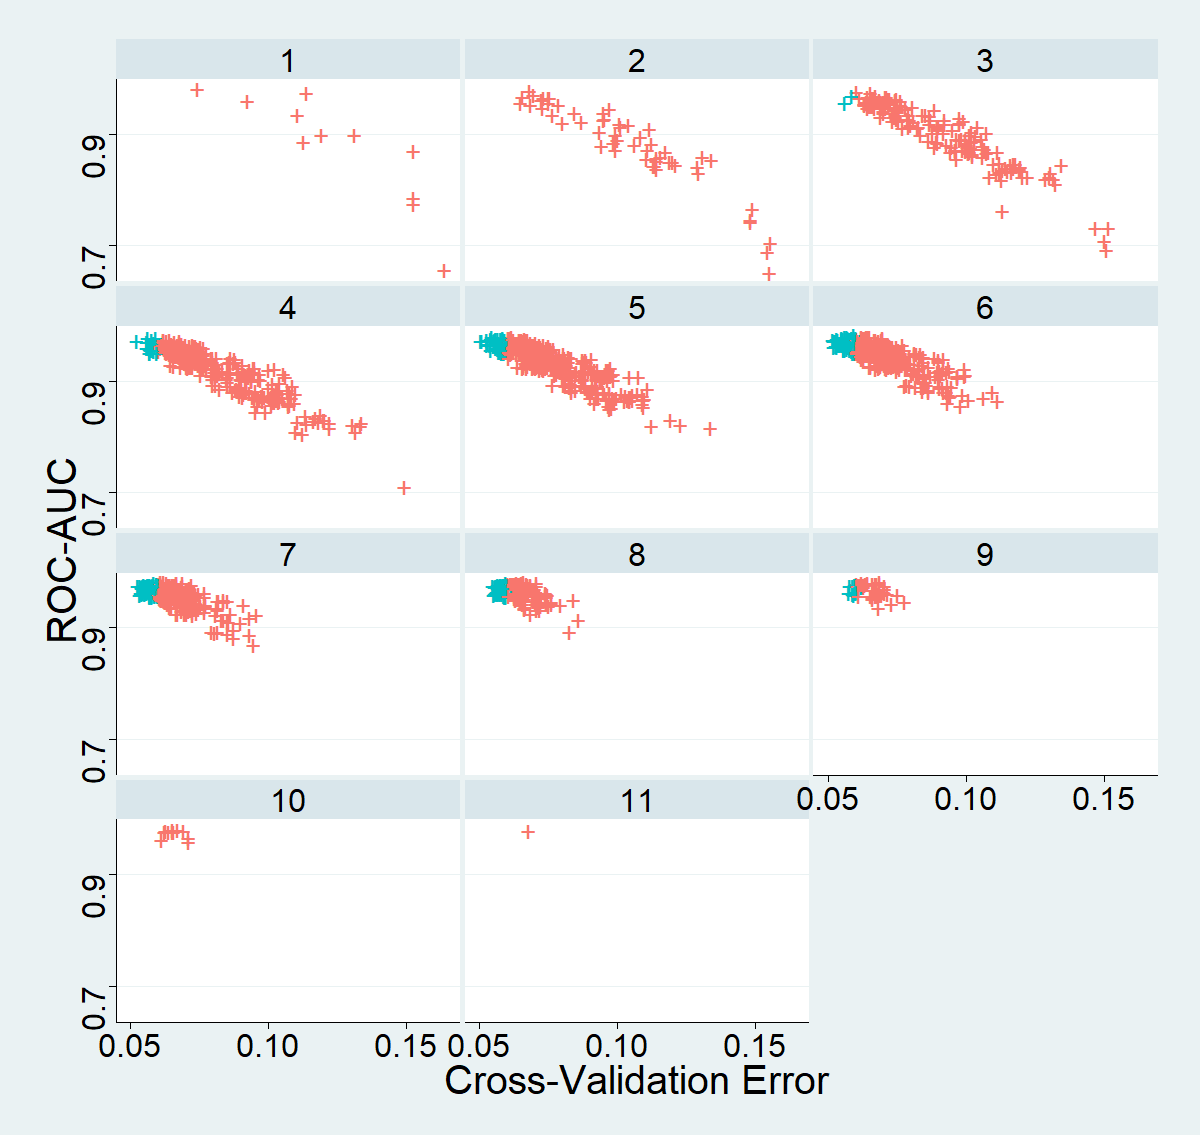


Abbreviations: ROC-AUC – area under the receiver operator characteristics curve.

*Decision Tree Development*

CART models were trained using the *rpart* package.(3) In the exploratory analysis, superior regression models required at least three variables. To maximize model accuracy and minimize complexity, the optimal CART models with two variables were chosen (using a cost complexity factor of 0.05) and amalgamated into a single three-variable model. The combined three-variable model contains the same three variables that most frequently appear in the 22 superior logistic regression models with 4 or fewer variables (adjacent to the ischial tuberosities, peri-articular shoulder and interspinous bursa).

**References**

1. Canty A, Ripley B. boot: Bootstrap R (S-Plus) Functions 2017

2. Davison AC, Hinkley DV. Bootstrap Methods and Their Applications. Cambridge Cambridge University Press; 1997.

3. Therneau T, Atkinson B. rpart: Recursive Partitioning and Regression Trees 2019 [Available from: <https://CRAN.R-project.org/package=rpart>.

1. Department of Rheumatology, Austin Health, Heidelberg VIC, Australia. [↑](#footnote-ref-1)
2. Department of Medicine, University of Melbourne, Parkville VIC, Australia. [↑](#footnote-ref-2)
3. Department of Molecular Imaging and Therapy, Austin Health, Heidelberg VIC, Australia. [↑](#footnote-ref-3)
4. Olivia Newton-John Cancer Research Institute, and School of Cancer Medicine, La Trobe University, Heidelberg VIC, Australia. [↑](#footnote-ref-4)
